# Supplementary material
Source: ML conference proceedings conference paper supplement (https://proceedings.mlr.press/v70/brown17a.html)
Supplement: Supplementary file [file brown17a-supp.pdf]

## Appendix

In the appendices we present the proofs, and additional lemmas that are used in the proofs.

### A. Lemma 1

Lemma 1 proves that if (5) is satisfied for some action  $a \in A(I)$  on iteration  $T$ , then the value of action  $a$  and all its descendants on every iteration played so far can be set to the  $T$ -near counterfactual best response value. The same lemma holds if one replaces the  $T$ -near counterfactual best response values with exact counterfactual best response values. The proof for Lemma 1 draws from recent work on warm starting CFR using only an average strategy profile (Brown & Sandholm, 2016).

**Lemma 1.** *Assume  $T$  iterations of CFR with RM have been played in a two-player zero-sum game. If  $T(\psi^{\bar{\sigma}^{T,i,T}}(I, a)) \leq \sum_{t=1}^T v^{\sigma^t}(I)$  and one sets  $v^{\sigma^t}(I, a) = \psi^{\bar{\sigma}^{T,i,T}}(I, a)$  for each  $t \leq T$  and for each  $I' \in D(I, a)$  sets  $v^{\sigma^t}(I', a') = \psi^{\bar{\sigma}^{T,i,T}}(I', a')$  and  $v^{\sigma^t}(I') = \psi^{\bar{\sigma}^{T,i,T}}(I')$  then after  $T'$  additional iterations of CFR with RM, the bound on exploitability of  $\bar{\sigma}^{T+T'}$  is no worse than having played  $T + T'$  iterations of CFR with RM unaltered.*

*Proof.* The proof builds upon Theorem 2 in (Brown & Sandholm, 2016). Assume  $T(\psi^{\bar{\sigma}^{T,i,T}}(I, a)) \leq \sum_{t=1}^T v^{\sigma^t}(I)$ . We wish to warm start to  $T$  iterations. For each  $I' \in D(I, a)$  set  $v^{\sigma^t}(I', a') = \psi^{\bar{\sigma}^{T,i,T}}(I', a')$  and  $v^{\sigma^t}(I') = \psi^{\bar{\sigma}^{T,i,T}}(I')$  and set  $v^{\sigma^t}(I, a) = \psi^{\bar{\sigma}^{T,i,T}}(I, a)$  for all  $t \leq T$ . For every other action, leave regret unchanged. For each  $I' \in D(I, a)$  we know by construction that  $\Phi(R^T(I'))$  is within the CFR bound  $y_{I'}^T$  after changing regret. By assumption  $T(\psi^{\bar{\sigma}^{T,i,T}}(I, a)) \leq \sum_{t=1}^T v^{\sigma^t}(I)$ , so  $R^T(I, a) \leq 0$  and therefore  $\Phi(R^T(I))$  is unchanged. Finally, since the  $T$  iterations were played according to CFR with RM and regret is unchanged for every other information set  $I''$ , so the conditions for Theorem 2 in (Brown & Sandholm, 2016) hold for every information set, and therefore we can warm start to  $T$  iterations of CFR with RM with no penalty to the convergence bound.  $\square$

### B. Proof of Theorem 1

*Proof.* From Lemma 1 we can immediately set regret for  $a \in A(I)$  to  $v^{\sigma^t}(I, a) = \psi^{\bar{\sigma}^{T,i,T}}(I, a)$ . By construction of  $T'$ ,  $R^t(I, a)$  is guaranteed to be nonpositive for  $T \leq t \leq T + T'$  and therefore  $\sigma^t(I, a) = 0$ . Thus,  $\bar{\sigma}_i^{T+T'}(I')$  for  $I' \in D(I, a)$  is identical regardless of what is played in  $D(I, a)$  during  $T \leq t \leq T + T'$ .

Since  $(T + T')(\psi^{\bar{\sigma}_i^{T+T'}(I, a)}) \leq T(\psi^{\bar{\sigma}_i^{T,i,T}}(I, a)) + T'(U(I, a))$  and  $\sum_{t=1}^{T+T'} v^{\sigma^t}(I) \geq$

$\sum_{t=1}^T v^{\sigma^t}(I) + T'(L(I))$ , so by the definition of  $T'$ ,  $(T + T')(\psi^{\bar{\sigma}_i^{T+T'}(I, a)}) \leq \sum_{t=1}^{T+T'} v^{\sigma^t}(I)$ . So if regrets in  $D(I, a)$  and  $R^{T+T'}(I, a)$  are set according to Lemma 1, then after  $T''$  additional iterations of CFR with RM, the bound on exploitability of  $\bar{\sigma}^{T+T'+T''}$  is no worse than having played  $T + T' + T''$  iterations of CFR with RM from scratch.  $\square$

### C. Proof of Theorem 2

*Proof.* Consider an information set  $I$  and action  $a \in A(I)$  where for every opponent Nash equilibrium strategy  $\sigma_{-P(I)}^*$ ,  $CBV^{\sigma_{-P(I)}^*}(I, a) < CBV^{\sigma_{-P(I)}^*}(I)$ . Let  $i = P(I)$ . Let  $\delta = \min_{\sigma_{-i} \in \Sigma^*} (CBV^{\sigma_{-i}}(I) - CBV^{\sigma_{-i}}(I, a))$  where  $\Sigma^*$  is the set of Nash equilibria. Let  $\sigma'_{-i} = \arg \max_{\sigma_{-i} \in \Sigma_{-i} | CBV^{\sigma_{-i}}(I) - CBV^{\sigma_{-i}}(I, a) \leq \frac{3\delta}{4}} u_{-i}(\sigma_{-i}, BR(\sigma_{-i}))$ . Since  $\sigma'_{-i}$  is not a Nash equilibrium strategy and CFR converges to a Nash equilibrium strategy for both players, so there exists a  $T_\delta$  such that for all  $T \geq T_\delta$ ,  $CBV^{\bar{\sigma}^{T,i,T}}(I) - CBV^{\bar{\sigma}^{T,i,T}}(I, a) > \frac{3\delta}{4}$ . Let  $T'_{I,a} = \frac{4|I|^2 \Delta^2 |A|}{\delta^2}$ . For  $T \geq T'_{I,a}$  since  $R_i^T \leq \sum_{I \in \mathcal{I}_i} R^T(I)$ , so  $CBV^{\bar{\sigma}^{T,i,T}}(I) - \sum_{t=1}^T v^{\sigma^t}(I) \leq \frac{\delta}{2}$ . Let  $T_{I,a} = \max(T'_{I,a}, T_\delta)$  and  $\delta_{I,a} = \frac{\delta}{4}$ . Then for  $T \geq T_{I,a}$ ,  $CBV^{\bar{\sigma}^{T,i,T}}(I, a) - \frac{\sum_{t=1}^T v^{\sigma^t}(I)}{T} \leq -\delta_{I,a}$ .  $\square$

### D. Proof of Corollary 1

*Proof.* Let  $I \notin \mathcal{I}_S$ . Then  $I \in D(I', a')$  for some  $I'$  and  $a' \in A(I')$  such that for every opponent Nash equilibrium strategy  $\sigma_{-P(I')}^*$ ,  $CBV^{\sigma_{-P(I')}^*}(I', a') < CBV^{\sigma_{-P(I')}^*}(I')$ . Applying Theorem 2, this means there exists a  $T_{I',a'}$  and  $\delta_{I',a'} > 0$  such that for  $T \geq T_{I',a'}$ ,  $CBV^{\bar{\sigma}^{T,i,T}}(I', a') - \frac{\sum_{t=1}^T v^{\sigma^t}(I')}{T} \leq -\delta_{I',a'}$ . So (5) always applies for  $T \geq T_{I',a'}$  for  $I'$  and  $a'$  and  $I$  will always be pruned. Since (8) does not require knowledge of regret, it need not be stored for  $I$ .

Since  $D(I', a')$  will always be pruned for  $T \geq T_{I',a'}$ , so for any  $T \geq \frac{(T_{I',a'})^2}{C^2}$  iterations for some constant  $C > 0$ ,  $\pi_i^{\bar{\sigma}^{T,i,T}}(I) \leq \frac{C}{\sqrt{T}}$ , which satisfies the threshold of the average strategy. Thus, the average strategy in  $D(I, a)$  can be discarded.  $\square$

### E. Lemma 2

**Lemma 2.** *If for all  $T \geq T'$  iterations of CFR with BRP,  $T(CBV^{\bar{\sigma}^{T,i,T}}(I, a)) - \sum_{t=1}^T v^{\sigma^t}(I) \leq -xT$  for some  $x > 0$ , then any history  $h'$  such that  $h \cdot a \sqsubseteq h'$  for some  $h \in I$  need only be traversed at most  $O(\ln(T))$  times.*

*Proof.* Let  $a \in A(I)$  be an action such that for all  $T \geq T'$ ,  $T(CBV^{\bar{\sigma}^T}(I, a)) - \sum_{t=1}^T v^{\sigma^t}(I) \leq -xT$  for some  $x > 0$ .  $\psi^{\bar{\sigma}^T, T}(I, a) \leq CBV^{\bar{\sigma}^T, T}$ , so from Theorem 1,  $D(I, a)$  can be pruned for  $m \geq \lfloor \frac{xT}{U(I, a) - L(I)} \rfloor$  iterations on iteration  $T$ . Thus, over iterations  $T \leq t \leq T + m$ , only a constant number of traversals must be done. So each iteration requires only  $\frac{C}{m}$  work when amortized, where  $C$  is a constant. Since  $x$ ,  $U(I, a)$ , and  $L(I)$  are constants, so on each iteration  $t \geq T'$ , only an average of  $\frac{C}{t}$  traversals of  $D(I, a)$  is required. Summing over all  $t \leq T$  for  $T \geq T'$ , and recognizing that  $T'$  is a constant, we get that action  $a$  is only taken  $O(\ln(T))$  over  $T$  iterations. Thus, any history  $h'$  such that  $h \cdot a \sqsubseteq h'$  for some  $h \in I$  need only be traversed at most  $O(\ln(T))$  times.  $\square$

### F. Proof of Theorem 3

*Proof.* Consider an  $h^* \notin S$ . Then there exists some  $h \cdot a \sqsubseteq h^*$  such that  $h \in S$  but  $h \cdot a \notin S$ . Let  $I = I(h)$  and  $i = P(I)$ . Since  $h \cdot a \notin S$  but  $h \in S$ , so for every Nash equilibrium  $\sigma^*$ ,  $CBV^{\sigma^*}(I, a) < CBV^{\sigma^*}(I)$ . From Theorem 2, there exists a  $T_{I, a}$  and  $\delta_{I, a} > 0$  such that after  $T \geq T_{I, a}$  iterations of CFR,  $CBV^{\bar{\sigma}^T, T}(I, a) - \frac{\sum_{t=1}^T v^{\sigma^t}(I)}{T} \leq -\delta_{I, a}$ . Thus from Lemma 2,  $h^*$  need only be traversed at most  $O(\ln(T))$  times.  $\square$
